# Supplementary material for: New interatomic potential parameters for molecular dynamics simulations of rare-earth (RE = La, Y, Lu, Sc) aluminosilicate glass structures: exploration of RE3+ field-strength effects
Source: Royal Society of Chemistry journal article supplement (doi:10.1039/c3cp51726h), 2013-01-01
Supplement: c3cp51726h.pdf [file c3cp51726h.pdf]

**Electronic Supplementary Information for**  
New Interatomic Potential Parameters for Molecular Dynamics  
Simulations of Rare-Earth (RE = La, Y, Lu, Sc) Aluminosilicate  
Glass Structures: Exploration of RE<sup>3+</sup> Field-Strength Effects

Kirill Okhotnikov, Baltzar Stevansson and Mattias Edén\*

Physical Chemistry Division, Department of Materials and Environmental Chemistry, Arrhenius  
Laboratory, Stockholm University, SE-106 91 Stockholm, Sweden

\*Corresponding author. E-mail: *mattias.eden@mmk.su.se*

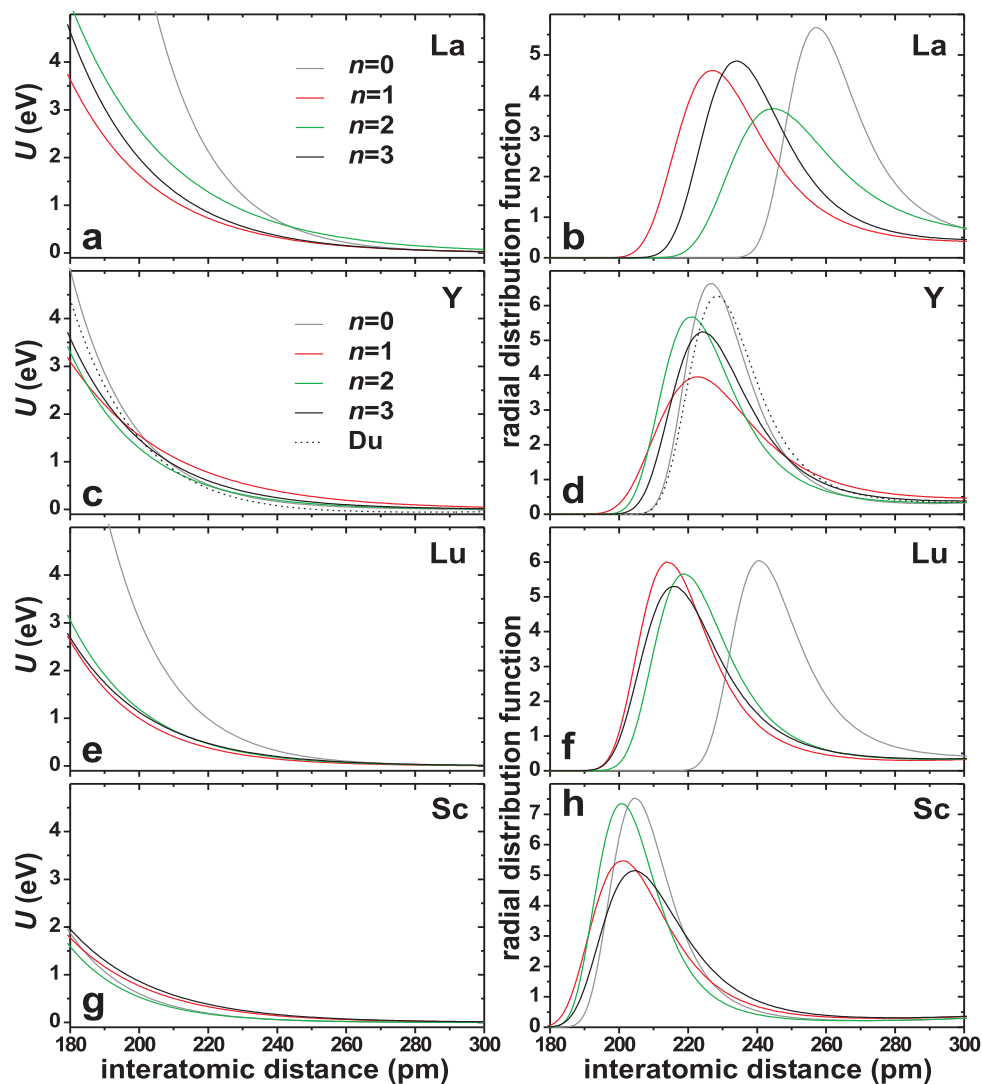

**Figure S1.** Potential energies (left panel) evaluated from Eq. (4) of the main text, and RDFs (right panel), both plotted for increasing RE–O distance and calculated for the RE(2.21) glass compositions. The parameters  $S^{(n)} \equiv \{A_{\text{RE-O}}^{(n)}, \rho_{\text{RE-O}}^{(n)}\}$  are associated with increasing degrees of iteration ( $0 \leq n \leq 3$ ) and were employed for RE corresponding to (a, b) La; (c, d) Y; (e, f) Lu, and (g, h) Sc. (a) identifies each curve with its respective set  $S^{(n)}$ . (c, d) also display the results of instead using the Y–O interionic potential of [J. Du, *J. Am. Ceram. Soc.*, 2009, **92**, 87-95] via Eq. (3) of the main text. The values  $\{A_{\text{RE-O}}^{(3)}, \rho_{\text{RE-O}}^{(3)}\}$  of the last iteration stage are listed in Table 1 and were used in all other evaluations/simulations.
